# Supplementary material for: Streptococcus pneumoniae carriage and antibiotic susceptibility among Indonesian pilgrims during the Hajj pilgrimage in 2015
Source: PubMed Central journal article supplement (PMC7837496; doi:10.1371/journal.pone.0246122), 2021-01-26
Supplement: pone.0246122.s001.pdf [file pone.0246122.s001.pdf]

**Case Report Form - "Molecular Epidemiology of Streptococcus pneumoniae in Indonesian Hajj"**

Unit CEEBM CMH-FMUI, Eijkman Molecular Biology Institute, and Hajj Health Center Indonesia MoH

Principal Investigator: Dr. dr. Kuntjoro Harimurti, SpPD-KGER, MSc

| A. Data Source Information                                                                                                                                                                                                                                                                                                                                                                         |                                                                                                                                                                                                                                                                                                                                                                                                                                                                                                                                                                                                                                                                                                                                                                                                                                    |                                           |                                                                         |                                                                                                                                                                                                                                                                                                                                                                                                    |                                       |                                           |                                                                          |                                                 |                                       |                                |                                                                          |
|----------------------------------------------------------------------------------------------------------------------------------------------------------------------------------------------------------------------------------------------------------------------------------------------------------------------------------------------------------------------------------------------------|------------------------------------------------------------------------------------------------------------------------------------------------------------------------------------------------------------------------------------------------------------------------------------------------------------------------------------------------------------------------------------------------------------------------------------------------------------------------------------------------------------------------------------------------------------------------------------------------------------------------------------------------------------------------------------------------------------------------------------------------------------------------------------------------------------------------------------|-------------------------------------------|-------------------------------------------------------------------------|----------------------------------------------------------------------------------------------------------------------------------------------------------------------------------------------------------------------------------------------------------------------------------------------------------------------------------------------------------------------------------------------------|---------------------------------------|-------------------------------------------|--------------------------------------------------------------------------|-------------------------------------------------|---------------------------------------|--------------------------------|--------------------------------------------------------------------------|
| Stick the barcode inside this box                                                                                                                                                                                                                                                                                                                                                                  | <table style="width:100%;"> <tr> <td style="width: 50%; padding: 5px;"> <b>A1. Enumerator Name:</b><br/>                     .....</td> <td style="width: 50%; padding: 5px;"> <b>A2. Sample collecting date:</b> dd <input type="text"/> - Sept- 2015</td> </tr> <tr> <td style="padding: 5px;"> <b>A3. Embarkation:</b> <table style="width:100%; font-size: small;"> <tr> <td><input type="radio"/> Banda Aceh</td> <td><input type="radio"/> Makassar/Gorontalo;</td> </tr> <tr> <td><input type="radio"/> Medan;</td> <td><input type="radio"/> Banjarmasin/Palangkaraya;</td> </tr> <tr> <td><input type="radio"/> Jakarta/Bekasi;</td> <td><input type="radio"/> Surabaya</td> </tr> </table> </td> <td style="padding: 5px;"> <b>A4. Flight group number / Kloter :</b> <input type="text"/> e.g.: 023</td> </tr> </table> | <b>A1. Enumerator Name:</b><br>.....      | <b>A2. Sample collecting date:</b> dd <input type="text"/> - Sept- 2015 | <b>A3. Embarkation:</b> <table style="width:100%; font-size: small;"> <tr> <td><input type="radio"/> Banda Aceh</td> <td><input type="radio"/> Makassar/Gorontalo;</td> </tr> <tr> <td><input type="radio"/> Medan;</td> <td><input type="radio"/> Banjarmasin/Palangkaraya;</td> </tr> <tr> <td><input type="radio"/> Jakarta/Bekasi;</td> <td><input type="radio"/> Surabaya</td> </tr> </table> | <input type="radio"/> Banda Aceh      | <input type="radio"/> Makassar/Gorontalo; | <input type="radio"/> Medan;                                             | <input type="radio"/> Banjarmasin/Palangkaraya; | <input type="radio"/> Jakarta/Bekasi; | <input type="radio"/> Surabaya | <b>A4. Flight group number / Kloter :</b> <input type="text"/> e.g.: 023 |
| <b>A1. Enumerator Name:</b><br>.....                                                                                                                                                                                                                                                                                                                                                               | <b>A2. Sample collecting date:</b> dd <input type="text"/> - Sept- 2015                                                                                                                                                                                                                                                                                                                                                                                                                                                                                                                                                                                                                                                                                                                                                            |                                           |                                                                         |                                                                                                                                                                                                                                                                                                                                                                                                    |                                       |                                           |                                                                          |                                                 |                                       |                                |                                                                          |
| <b>A3. Embarkation:</b> <table style="width:100%; font-size: small;"> <tr> <td><input type="radio"/> Banda Aceh</td> <td><input type="radio"/> Makassar/Gorontalo;</td> </tr> <tr> <td><input type="radio"/> Medan;</td> <td><input type="radio"/> Banjarmasin/Palangkaraya;</td> </tr> <tr> <td><input type="radio"/> Jakarta/Bekasi;</td> <td><input type="radio"/> Surabaya</td> </tr> </table> | <input type="radio"/> Banda Aceh                                                                                                                                                                                                                                                                                                                                                                                                                                                                                                                                                                                                                                                                                                                                                                                                   | <input type="radio"/> Makassar/Gorontalo; | <input type="radio"/> Medan;                                            | <input type="radio"/> Banjarmasin/Palangkaraya;                                                                                                                                                                                                                                                                                                                                                    | <input type="radio"/> Jakarta/Bekasi; | <input type="radio"/> Surabaya            | <b>A4. Flight group number / Kloter :</b> <input type="text"/> e.g.: 023 |                                                 |                                       |                                |                                                                          |
| <input type="radio"/> Banda Aceh                                                                                                                                                                                                                                                                                                                                                                   | <input type="radio"/> Makassar/Gorontalo;                                                                                                                                                                                                                                                                                                                                                                                                                                                                                                                                                                                                                                                                                                                                                                                          |                                           |                                                                         |                                                                                                                                                                                                                                                                                                                                                                                                    |                                       |                                           |                                                                          |                                                 |                                       |                                |                                                                          |
| <input type="radio"/> Medan;                                                                                                                                                                                                                                                                                                                                                                       | <input type="radio"/> Banjarmasin/Palangkaraya;                                                                                                                                                                                                                                                                                                                                                                                                                                                                                                                                                                                                                                                                                                                                                                                    |                                           |                                                                         |                                                                                                                                                                                                                                                                                                                                                                                                    |                                       |                                           |                                                                          |                                                 |                                       |                                |                                                                          |
| <input type="radio"/> Jakarta/Bekasi;                                                                                                                                                                                                                                                                                                                                                              | <input type="radio"/> Surabaya                                                                                                                                                                                                                                                                                                                                                                                                                                                                                                                                                                                                                                                                                                                                                                                                     |                                           |                                                                         |                                                                                                                                                                                                                                                                                                                                                                                                    |                                       |                                           |                                                                          |                                                 |                                       |                                |                                                                          |

**B. Demography**

|                                                                                                                                                                                                                                                                                                                                                                                                                                                                |                                                                                                                                                                                                                                                                                                                                                                                                    |                                 |                                           |                                       |                                   |                                           |                                  |  |                                                                                                                                                                                                                                                                                                                                                                                                                                                                                                                                                                            |                                   |                                                |                                             |                                                 |                                           |                                           |                                        |  |                                     |  |
|----------------------------------------------------------------------------------------------------------------------------------------------------------------------------------------------------------------------------------------------------------------------------------------------------------------------------------------------------------------------------------------------------------------------------------------------------------------|----------------------------------------------------------------------------------------------------------------------------------------------------------------------------------------------------------------------------------------------------------------------------------------------------------------------------------------------------------------------------------------------------|---------------------------------|-------------------------------------------|---------------------------------------|-----------------------------------|-------------------------------------------|----------------------------------|--|----------------------------------------------------------------------------------------------------------------------------------------------------------------------------------------------------------------------------------------------------------------------------------------------------------------------------------------------------------------------------------------------------------------------------------------------------------------------------------------------------------------------------------------------------------------------------|-----------------------------------|------------------------------------------------|---------------------------------------------|-------------------------------------------------|-------------------------------------------|-------------------------------------------|----------------------------------------|--|-------------------------------------|--|
| <b>B1. Date of birth:</b> dd <input type="text"/> - mm <input type="text"/> - yyyy <input type="text"/> or 99 <input type="radio"/> Unknown;                                                                                                                                                                                                                                                                                                                   |                                                                                                                                                                                                                                                                                                                                                                                                    |                                 |                                           |                                       |                                   |                                           |                                  |  |                                                                                                                                                                                                                                                                                                                                                                                                                                                                                                                                                                            |                                   |                                                |                                             |                                                 |                                           |                                           |                                        |  |                                     |  |
| <b>B2. Gender:</b> <input type="radio"/> Male; <input type="radio"/> Female;                                                                                                                                                                                                                                                                                                                                                                                   | <b>B3. Completed education:</b> <table style="width:100%; font-size: small;"> <tr> <td><input type="radio"/> None;</td> <td><input type="radio"/> Senior high school;</td> </tr> <tr> <td><input type="radio"/> Primary school;</td> <td><input type="radio"/> College</td> </tr> <tr> <td><input type="radio"/> Junior high school;</td> <td><input type="radio"/> University</td> </tr> </table> | <input type="radio"/> None;     | <input type="radio"/> Senior high school; | <input type="radio"/> Primary school; | <input type="radio"/> College     | <input type="radio"/> Junior high school; | <input type="radio"/> University |  |                                                                                                                                                                                                                                                                                                                                                                                                                                                                                                                                                                            |                                   |                                                |                                             |                                                 |                                           |                                           |                                        |  |                                     |  |
| <input type="radio"/> None;                                                                                                                                                                                                                                                                                                                                                                                                                                    | <input type="radio"/> Senior high school;                                                                                                                                                                                                                                                                                                                                                          |                                 |                                           |                                       |                                   |                                           |                                  |  |                                                                                                                                                                                                                                                                                                                                                                                                                                                                                                                                                                            |                                   |                                                |                                             |                                                 |                                           |                                           |                                        |  |                                     |  |
| <input type="radio"/> Primary school;                                                                                                                                                                                                                                                                                                                                                                                                                          | <input type="radio"/> College                                                                                                                                                                                                                                                                                                                                                                      |                                 |                                           |                                       |                                   |                                           |                                  |  |                                                                                                                                                                                                                                                                                                                                                                                                                                                                                                                                                                            |                                   |                                                |                                             |                                                 |                                           |                                           |                                        |  |                                     |  |
| <input type="radio"/> Junior high school;                                                                                                                                                                                                                                                                                                                                                                                                                      | <input type="radio"/> University                                                                                                                                                                                                                                                                                                                                                                   |                                 |                                           |                                       |                                   |                                           |                                  |  |                                                                                                                                                                                                                                                                                                                                                                                                                                                                                                                                                                            |                                   |                                                |                                             |                                                 |                                           |                                           |                                        |  |                                     |  |
| <b>B4. Living place status:</b> <table style="width:100%; font-size: small;"> <tr> <td><input type="radio"/> Self-owned;</td> <td><input type="radio"/> Office's;</td> </tr> <tr> <td><input type="radio"/> Parents'/child's;</td> <td><input type="radio"/> Orphanage;</td> </tr> <tr> <td><input type="radio"/> Relative's;</td> <td><input type="radio"/> Others, i.e.: .....</td> </tr> <tr> <td><input type="radio"/> Rent;</td> <td></td> </tr> </table> | <input type="radio"/> Self-owned;                                                                                                                                                                                                                                                                                                                                                                  | <input type="radio"/> Office's; | <input type="radio"/> Parents'/child's;   | <input type="radio"/> Orphanage;      | <input type="radio"/> Relative's; | <input type="radio"/> Others, i.e.: ..... | <input type="radio"/> Rent;      |  | <b>B6. Activity:</b> <table style="width:100%; font-size: small;"> <tr> <td><input type="radio"/> Unemployed;</td> <td><input type="radio"/> Retired gov'n't officer;</td> </tr> <tr> <td><input type="radio"/> Housewife answer toe;</td> <td><input type="radio"/> Retired private employee;</td> </tr> <tr> <td><input type="radio"/> Government officer;</td> <td><input type="radio"/> Others, i.e.: .....</td> </tr> <tr> <td><input type="radio"/> Private employee</td> <td></td> </tr> <tr> <td><input type="radio"/> Entrepreneur;</td> <td></td> </tr> </table> | <input type="radio"/> Unemployed; | <input type="radio"/> Retired gov'n't officer; | <input type="radio"/> Housewife answer toe; | <input type="radio"/> Retired private employee; | <input type="radio"/> Government officer; | <input type="radio"/> Others, i.e.: ..... | <input type="radio"/> Private employee |  | <input type="radio"/> Entrepreneur; |  |
| <input type="radio"/> Self-owned;                                                                                                                                                                                                                                                                                                                                                                                                                              | <input type="radio"/> Office's;                                                                                                                                                                                                                                                                                                                                                                    |                                 |                                           |                                       |                                   |                                           |                                  |  |                                                                                                                                                                                                                                                                                                                                                                                                                                                                                                                                                                            |                                   |                                                |                                             |                                                 |                                           |                                           |                                        |  |                                     |  |
| <input type="radio"/> Parents'/child's;                                                                                                                                                                                                                                                                                                                                                                                                                        | <input type="radio"/> Orphanage;                                                                                                                                                                                                                                                                                                                                                                   |                                 |                                           |                                       |                                   |                                           |                                  |  |                                                                                                                                                                                                                                                                                                                                                                                                                                                                                                                                                                            |                                   |                                                |                                             |                                                 |                                           |                                           |                                        |  |                                     |  |
| <input type="radio"/> Relative's;                                                                                                                                                                                                                                                                                                                                                                                                                              | <input type="radio"/> Others, i.e.: .....                                                                                                                                                                                                                                                                                                                                                          |                                 |                                           |                                       |                                   |                                           |                                  |  |                                                                                                                                                                                                                                                                                                                                                                                                                                                                                                                                                                            |                                   |                                                |                                             |                                                 |                                           |                                           |                                        |  |                                     |  |
| <input type="radio"/> Rent;                                                                                                                                                                                                                                                                                                                                                                                                                                    |                                                                                                                                                                                                                                                                                                                                                                                                    |                                 |                                           |                                       |                                   |                                           |                                  |  |                                                                                                                                                                                                                                                                                                                                                                                                                                                                                                                                                                            |                                   |                                                |                                             |                                                 |                                           |                                           |                                        |  |                                     |  |
| <input type="radio"/> Unemployed;                                                                                                                                                                                                                                                                                                                                                                                                                              | <input type="radio"/> Retired gov'n't officer;                                                                                                                                                                                                                                                                                                                                                     |                                 |                                           |                                       |                                   |                                           |                                  |  |                                                                                                                                                                                                                                                                                                                                                                                                                                                                                                                                                                            |                                   |                                                |                                             |                                                 |                                           |                                           |                                        |  |                                     |  |
| <input type="radio"/> Housewife answer toe;                                                                                                                                                                                                                                                                                                                                                                                                                    | <input type="radio"/> Retired private employee;                                                                                                                                                                                                                                                                                                                                                    |                                 |                                           |                                       |                                   |                                           |                                  |  |                                                                                                                                                                                                                                                                                                                                                                                                                                                                                                                                                                            |                                   |                                                |                                             |                                                 |                                           |                                           |                                        |  |                                     |  |
| <input type="radio"/> Government officer;                                                                                                                                                                                                                                                                                                                                                                                                                      | <input type="radio"/> Others, i.e.: .....                                                                                                                                                                                                                                                                                                                                                          |                                 |                                           |                                       |                                   |                                           |                                  |  |                                                                                                                                                                                                                                                                                                                                                                                                                                                                                                                                                                            |                                   |                                                |                                             |                                                 |                                           |                                           |                                        |  |                                     |  |
| <input type="radio"/> Private employee                                                                                                                                                                                                                                                                                                                                                                                                                         |                                                                                                                                                                                                                                                                                                                                                                                                    |                                 |                                           |                                       |                                   |                                           |                                  |  |                                                                                                                                                                                                                                                                                                                                                                                                                                                                                                                                                                            |                                   |                                                |                                             |                                                 |                                           |                                           |                                        |  |                                     |  |
| <input type="radio"/> Entrepreneur;                                                                                                                                                                                                                                                                                                                                                                                                                            |                                                                                                                                                                                                                                                                                                                                                                                                    |                                 |                                           |                                       |                                   |                                           |                                  |  |                                                                                                                                                                                                                                                                                                                                                                                                                                                                                                                                                                            |                                   |                                                |                                             |                                                 |                                           |                                           |                                        |  |                                     |  |
| <b>B5. House area</b> <input type="text"/> m <sup>2</sup> or 99 <input type="radio"/> Unknown;                                                                                                                                                                                                                                                                                                                                                                 |                                                                                                                                                                                                                                                                                                                                                                                                    |                                 |                                           |                                       |                                   |                                           |                                  |  |                                                                                                                                                                                                                                                                                                                                                                                                                                                                                                                                                                            |                                   |                                                |                                             |                                                 |                                           |                                           |                                        |  |                                     |  |
| <b>B7. Total family member/ person living in the house (including study subject):</b> <input type="text"/> people                                                                                                                                                                                                                                                                                                                                              |                                                                                                                                                                                                                                                                                                                                                                                                    |                                 |                                           |                                       |                                   |                                           |                                  |  |                                                                                                                                                                                                                                                                                                                                                                                                                                                                                                                                                                            |                                   |                                                |                                             |                                                 |                                           |                                           |                                        |  |                                     |  |
| <b>with detail:</b>                                                                                                                                                                                                                                                                                                                                                                                                                                            |                                                                                                                                                                                                                                                                                                                                                                                                    |                                 |                                           |                                       |                                   |                                           |                                  |  |                                                                                                                                                                                                                                                                                                                                                                                                                                                                                                                                                                            |                                   |                                                |                                             |                                                 |                                           |                                           |                                        |  |                                     |  |
| <b>B7a. Total elderly (age ≥ 60 years)</b>                                                                                                                                                                                                                                                                                                                                                                                                                     | <input type="text"/> people                                                                                                                                                                                                                                                                                                                                                                        |                                 |                                           |                                       |                                   |                                           |                                  |  |                                                                                                                                                                                                                                                                                                                                                                                                                                                                                                                                                                            |                                   |                                                |                                             |                                                 |                                           |                                           |                                        |  |                                     |  |
| <b>B7b. Total adults (18 ≤ age &lt; 60 years)</b>                                                                                                                                                                                                                                                                                                                                                                                                              | <input type="text"/> people                                                                                                                                                                                                                                                                                                                                                                        |                                 |                                           |                                       |                                   |                                           |                                  |  |                                                                                                                                                                                                                                                                                                                                                                                                                                                                                                                                                                            |                                   |                                                |                                             |                                                 |                                           |                                           |                                        |  |                                     |  |
| <b>B7c. Total children (5 ≤ age &lt; 18 years):</b>                                                                                                                                                                                                                                                                                                                                                                                                            | <input type="text"/> people                                                                                                                                                                                                                                                                                                                                                                        |                                 |                                           |                                       |                                   |                                           |                                  |  |                                                                                                                                                                                                                                                                                                                                                                                                                                                                                                                                                                            |                                   |                                                |                                             |                                                 |                                           |                                           |                                        |  |                                     |  |
| <b>B7d. Total children (2 ≤ age &lt; 5 years):</b>                                                                                                                                                                                                                                                                                                                                                                                                             | <input type="text"/> people                                                                                                                                                                                                                                                                                                                                                                        |                                 |                                           |                                       |                                   |                                           |                                  |  |                                                                                                                                                                                                                                                                                                                                                                                                                                                                                                                                                                            |                                   |                                                |                                             |                                                 |                                           |                                           |                                        |  |                                     |  |
| <b>B7e. Total children (age &lt; 2 years):</b>                                                                                                                                                                                                                                                                                                                                                                                                                 | <input type="text"/> people                                                                                                                                                                                                                                                                                                                                                                        |                                 |                                           |                                       |                                   |                                           |                                  |  |                                                                                                                                                                                                                                                                                                                                                                                                                                                                                                                                                                            |                                   |                                                |                                             |                                                 |                                           |                                           |                                        |  |                                     |  |

**C. Clinical data**

**C1. In the last 1 year, often have the following symptoms:**

|                | C1a.<br>Symptoms                                   |  | C1b.<br>If answer to answer to C1a (yes), how often in a month?                    |
|----------------|----------------------------------------------------|--|------------------------------------------------------------------------------------|
| 1. Phlegm      | <input type="radio"/> No <input type="radio"/> Yes |  | <input type="radio"/> <once <input type="radio"/> once <input type="radio"/> >once |
| 2. Dry cough   | <input type="radio"/> No <input type="radio"/> Yes |  | <input type="radio"/> <once <input type="radio"/> once <input type="radio"/> >once |
| 3. Fever       | <input type="radio"/> No <input type="radio"/> Yes |  | <input type="radio"/> <once <input type="radio"/> once <input type="radio"/> >once |
| 4. Sore throat | <input type="radio"/> No <input type="radio"/> Yes |  | <input type="radio"/> <once <input type="radio"/> once <input type="radio"/> >once |
| 5. Flu         | <input type="radio"/> No <input type="radio"/> Yes |  | <input type="radio"/> <once <input type="radio"/> once <input type="radio"/> >once |
| 6. Earache     | <input type="radio"/> No <input type="radio"/> Yes |  | <input type="radio"/> <once <input type="radio"/> once <input type="radio"/> >once |

**Case Report Form - "Molecular Epidemiology of Streptococcus pneumoniae in Indonesian Hajj"**

Unit CEEBM CMH-FMUI, Eijkman Molecular Biology Institute, and Hajj Health Center Indonesia MoH

Principal Investigator: Dr. dr. Kuntjoro Harimurti, SpPD-KGER, MSc

**C2.** Hospital admission in last 3 months:  No (continue to no C3)  Yes

**C2a.** If answer to answer to C2 (Yes), duration of admission:    days  99 Unknown

---

**C3.** Antibiotic use in the past 3 months:  No  Yes  99 Unknown

---

**C4.** History of comorbid disease:  None (continue to no C5)  Yes, If answer to C4 (Yes), please mention:

**C4a.** COPD  None  Yes

**C4b.** Lung TB  None  Yes

**C4c.** Bronchiectasis  None  Yes

**C4d.** Heart failure  None  Yes

**C4e.** Chronic liver disease/ liver cirrhosis  None  Yes

**C4f.** Stroke  None  Yes

**C4i.** Diabetes melitus  None  Yes

**C4k.** Others, i.e.: .....  None  Yes

---

**C5.** In the last 5 years, subject has received pneumococcal vaccine before:  No (continue to no C6)  Yes

If answer to C5 (Yes):

**C5a.** Last vaccination in year:      99 Unknown

**C5b.** Vaccine type:  1 PCV 13  2 PPV23  3 PCV 7  4 PCV10  99 Unknown

---

**C6.** Subject is smoker:  No (continue to no C7)  Yes  2 Yes before but now already stop

**C6a.** If answer to C6 (yes), total cigarette per day:    cigarette per day

If answer to C6 (Yes before but now already stop):

**C6b.** Stop in year:    ; **C6c.** When smoking before, total cigarette per day:    cigarette per day

---

**C7.** Family living in the same house who smoke:  No  Yes, if answer to C7 (Yes)

| <b>C7a.</b>                                                                                                                                                                            | <b>C7b.</b>                                                                                                        |
|----------------------------------------------------------------------------------------------------------------------------------------------------------------------------------------|--------------------------------------------------------------------------------------------------------------------|
| Family relationship with subject                                                                                                                                                       | Total cigarette per day?                                                                                           |
| 1. <input type="radio"/> Parents; <input type="radio"/> 2 Husband/wife; <input type="radio"/> 3 Child;<br><input type="radio"/> 4 Sibling; <input type="radio"/> 5 Others, i.e.:.....; | <input type="text"/> <input type="text"/> <input type="text"/> cigarette per day; <input type="radio"/> 99 Unknown |
| 2. <input type="radio"/> Parents; <input type="radio"/> 2 Husband/wife; <input type="radio"/> 3 Child;<br><input type="radio"/> 4 Sibling; <input type="radio"/> 5 Others, i.e.:.....; | <input type="text"/> <input type="text"/> <input type="text"/> cigarette per day; <input type="radio"/> 99 Unknown |
| 3. <input type="radio"/> Parents; <input type="radio"/> 2 Husband/wife; <input type="radio"/> 3 Child;<br><input type="radio"/> 4 Sibling; <input type="radio"/> 5 Others, i.e.:.....; | <input type="text"/> <input type="text"/> <input type="text"/> cigarette per day; <input type="radio"/> 99 Unknown |
| 4. <input type="radio"/> Parents; <input type="radio"/> 2 Husband/wife; <input type="radio"/> 3 Child;<br><input type="radio"/> 4 Sibling; <input type="radio"/> 5 Others, i.e.:.....; | <input type="text"/> <input type="text"/> <input type="text"/> cigarette per day; <input type="radio"/> 99 Unknown |

**Completed by:**

Personnel name : ..... Signature:

Date : dd   - September - 2015

**Case Report Form - "Molecular Epidemiology of Streptococcus pneumoniae in Indonesian Hajj"**

Unit CEEBM CMH-FMUI, Eijkman Molecular Biology Institute, and Hajj Health Center Indonesia MoH

Principal Investigator: Dr. dr. Kuntjoro Harimurti, SpPD-KGER, MSc

| E. A. Data Source Information                     |                                                                                                                                                                                                                                                                                                                                                                                                                                                                                                   |                                                                                                             |                                           |                                                                                                             |                              |                                                 |                                       |
|---------------------------------------------------|---------------------------------------------------------------------------------------------------------------------------------------------------------------------------------------------------------------------------------------------------------------------------------------------------------------------------------------------------------------------------------------------------------------------------------------------------------------------------------------------------|-------------------------------------------------------------------------------------------------------------|-------------------------------------------|-------------------------------------------------------------------------------------------------------------|------------------------------|-------------------------------------------------|---------------------------------------|
| <p>Stick the barcode inside this box</p>          | E1. Enumerator Name: _____                                                                                                                                                                                                                                                                                                                                                                                                                                                                        |                                                                                                             |                                           |                                                                                                             |                              |                                                 |                                       |
|                                                   | E2. Sample collecting date: dd <input type="text"/> <input type="text"/> - Oct- 2015                                                                                                                                                                                                                                                                                                                                                                                                              |                                                                                                             |                                           |                                                                                                             |                              |                                                 |                                       |
|                                                   | <table border="0"> <tr> <td>E3. Embarkation: <input type="radio"/> Banda Aceh</td> <td><input type="radio"/> Makassar/Gorontalo;</td> <td rowspan="3">E4. Flight group number / Kloter : <input type="text"/> <input type="text"/> <input type="text"/> e.g.: 023</td> </tr> <tr> <td><input type="radio"/> Medan;</td> <td><input type="radio"/> Banjarmasin/Palangkaraya;</td> </tr> <tr> <td><input type="radio"/> Jakarta/Bekasi;</td> <td><input type="radio"/> Surabaya</td> </tr> </table> | E3. Embarkation: <input type="radio"/> Banda Aceh                                                           | <input type="radio"/> Makassar/Gorontalo; | E4. Flight group number / Kloter : <input type="text"/> <input type="text"/> <input type="text"/> e.g.: 023 | <input type="radio"/> Medan; | <input type="radio"/> Banjarmasin/Palangkaraya; | <input type="radio"/> Jakarta/Bekasi; |
| E3. Embarkation: <input type="radio"/> Banda Aceh | <input type="radio"/> Makassar/Gorontalo;                                                                                                                                                                                                                                                                                                                                                                                                                                                         | E4. Flight group number / Kloter : <input type="text"/> <input type="text"/> <input type="text"/> e.g.: 023 |                                           |                                                                                                             |                              |                                                 |                                       |
| <input type="radio"/> Medan;                      | <input type="radio"/> Banjarmasin/Palangkaraya;                                                                                                                                                                                                                                                                                                                                                                                                                                                   |                                                                                                             |                                           |                                                                                                             |                              |                                                 |                                       |
| <input type="radio"/> Jakarta/Bekasi;             | <input type="radio"/> Surabaya                                                                                                                                                                                                                                                                                                                                                                                                                                                                    |                                                                                                             |                                           |                                                                                                             |                              |                                                 |                                       |

**F. Exposure during Hajj Pilgrimage**

**F1.** Hospital admission in Saudi Arabia:                                       No (continue to no F2)                                       Yes

**F1a.** If the answer to F1 (Yes), admission duration:    days                                       Unknown

**F1b.** If the answer to F1 (Yes), based on indication: .....                                       Unknown

**F2.** Experiencing following symptoms while in Saudi Arabia:

| F2a. Symptoms  |                                                    | F2b. If answer to answer to F2a (yes), how often while in Saudi Arabia ? |                            |                             |
|----------------|----------------------------------------------------|--------------------------------------------------------------------------|----------------------------|-----------------------------|
| 1. Phlegm      | <input type="radio"/> No <input type="radio"/> Yes | <input type="radio"/> <once                                              | <input type="radio"/> once | <input type="radio"/> >once |
| 2. Dry cough   | <input type="radio"/> No <input type="radio"/> Yes | <input type="radio"/> <once                                              | <input type="radio"/> once | <input type="radio"/> >once |
| 3. Fever       | <input type="radio"/> No <input type="radio"/> Yes | <input type="radio"/> <once                                              | <input type="radio"/> once | <input type="radio"/> >once |
| 4. Sore throat | <input type="radio"/> No <input type="radio"/> Yes | <input type="radio"/> <once                                              | <input type="radio"/> once | <input type="radio"/> >once |
| 5. Flu         | <input type="radio"/> No <input type="radio"/> Yes | <input type="radio"/> <once                                              | <input type="radio"/> once | <input type="radio"/> >once |
| 6. Earache     | <input type="radio"/> No <input type="radio"/> Yes | <input type="radio"/> <once                                              | <input type="radio"/> once | <input type="radio"/> >once |

**F3.** During your stay in Saudi Arabia, have you ever stay with minimal 1 person who have respiratory tract/lung infection?  
 No (continue to no F4)                                       Yes  
*It is said Respiratory tract infection if there is symptoms of cough, flu, sorethroat, hurt when swallow, with or without fever  
It is said lung infection if there is productive cough (phlegm), difficulty breathing, pleuritic chest pain, with or without fever*

**F4.** The use of antibiotic during stay in Saudi Arabia:                                       No                                       Yes                                       Unknown

**Completed by:**

Personnel name : .....                                      Signature:

Date : dd   - October - 2015

**Case Report Form - "Epidemiologi Molekular *S. pneumoniae* pada Jemaah Haji Indonesia"**

Unit CEEBM RSCM-FKUI, Lembaga Biologi Molekular Eijkman, dan Pusat Kesehatan Haji Kementerian Kesehatan RI

Peneliti utama: Dr. dr. Kuntjoro Harimurti, SpPD-KGER, MSc

|                                                                                                                                                                                                                                                                                                               |                                      |                                                                                                                         |  |
|---------------------------------------------------------------------------------------------------------------------------------------------------------------------------------------------------------------------------------------------------------------------------------------------------------------|--------------------------------------|-------------------------------------------------------------------------------------------------------------------------|--|
| Stick the barcode inside this box                                                                                                                                                                                                                                                                             | <b>A. Informasi Sumber Data</b>      |                                                                                                                         |  |
|                                                                                                                                                                                                                                                                                                               | <b>A1. Nama Enumerator:</b><br>..... | <b>A2. Tanggal pengambilan sampel:</b> dd <input type="text"/> <input type="text"/> - Sept- 2015                        |  |
| <b>A3. Embarkasi:</b> 1 <input type="radio"/> Banda Aceh    4 <input type="radio"/> Makassar/Gorontalo;<br>2 <input type="radio"/> Medan;                                    5 <input type="radio"/> Banjarmasin/Palangkaraya;<br>3 <input type="radio"/> Jakarta/Bekasi;    6 <input type="radio"/> Surabaya |                                      | <b>A4. Nomor Kelompok terbang / Kloter :</b> <input type="text"/> <input type="text"/> <input type="text"/> contoh: 023 |  |

**B. Demografi**

|                                                                                                                                                                                                                                                                                                                                                                                                                                                                                                                     |                                                                                                                                                                                                                                                                                                                                           |
|---------------------------------------------------------------------------------------------------------------------------------------------------------------------------------------------------------------------------------------------------------------------------------------------------------------------------------------------------------------------------------------------------------------------------------------------------------------------------------------------------------------------|-------------------------------------------------------------------------------------------------------------------------------------------------------------------------------------------------------------------------------------------------------------------------------------------------------------------------------------------|
| <b>B1. Tanggal lahir:</b> dd <input type="text"/> <input type="text"/> - mm <input type="text"/> <input type="text"/> - yyyy <input type="text"/> <input type="text"/> <input type="text"/> <input type="text"/> atau    99 <input type="radio"/> Tidak diketahui;                                                                                                                                                                                                                                                  |                                                                                                                                                                                                                                                                                                                                           |
| <b>B2. Jenis kelamin:</b> 1 <input type="radio"/> Laki-laki;<br>2 <input type="radio"/> Perempuan;                                                                                                                                                                                                                                                                                                                                                                                                                  | <b>B3. Pendidikan terakhir (yang ditamatkan):</b><br>1 <input type="radio"/> Tidak sekolah;    4 <input type="radio"/> SMA;<br>2 <input type="radio"/> SD;                                    5 <input type="radio"/> Akademi<br>3 <input type="radio"/> SMP;                                    6 <input type="radio"/> Perguruan Tinggi |
| <b>B4. Status tempat tinggal:</b><br>1 <input type="radio"/> Rumah sendiri;                                    5 <input type="radio"/> Rumah dinas;<br>2 <input type="radio"/> Rumah orang tua/anak;    6 <input type="radio"/> Panti/yayasan;<br>3 <input type="radio"/> Rumah saudara;                                    7 <input type="radio"/> Lain-lain, sebutkan:<br>4 <input type="radio"/> Rumah kontrakan;                                    .....                                                       |                                                                                                                                                                                                                                                                                                                                           |
| <b>B5. Luas rumah (bangunan)</b> <input type="text"/> <input type="text"/> <input type="text"/> <input type="text"/> m2<br>atau    99 <input type="radio"/> Tidak diketahui;                                                                                                                                                                                                                                                                                                                                        |                                                                                                                                                                                                                                                                                                                                           |
| <b>B6. Aktivitas:</b><br>1 <input type="radio"/> Tidak bekerja;                                    6 <input type="radio"/> Pensiun PNS;<br>2 <input type="radio"/> Ibu rumah tangga;                                    7 <input type="radio"/> Pensiun Swasta;<br>3 <input type="radio"/> Karyawan PNS;                                    8 <input type="radio"/> Lain-lain, sebutkan:<br>4 <input type="radio"/> Karyawan Swasta<br>5 <input type="radio"/> Wiraswasta;                                    ..... |                                                                                                                                                                                                                                                                                                                                           |

**B7. Jumlah total anggota keluarga / orang yang tinggal serumah (termasuk subjek penelitian):**   orang

**Dengan rincian:**

|                                                             |                                                 |
|-------------------------------------------------------------|-------------------------------------------------|
| <b>B7a. Jumlah orang tua (usia ≥ 60 tahun)</b>              | <input type="text"/> <input type="text"/> orang |
| <b>B7b. Jumlah orang dewasa (18 ≤ usia &lt; 60 tahun)</b>   | <input type="text"/> <input type="text"/> orang |
| <b>B7c. Jumlah anak-anak usia (5 ≤ usia &lt; 18 tahun):</b> | <input type="text"/> <input type="text"/> orang |
| <b>B7d. Jumlah anak-anak usia (2 ≤ usia &lt; 5 tahun):</b>  | <input type="text"/> <input type="text"/> orang |
| <b>B7e. Jumlah anak-anak (usia &lt; 2 tahun):</b>           | <input type="text"/> <input type="text"/> orang |

**C. Data Klinis**

**C1. Dalam 1 tahun terakhir, sering mengalami gejala penyakit berikut:**

|    | C1a.<br>Gejala penyakit |                                                             | C1b.<br>Jika jawaban D2a (ya), seberapa sering terjadi dalam 1 bulan?                                |
|----|-------------------------|-------------------------------------------------------------|------------------------------------------------------------------------------------------------------|
| 1. | Batuk berdahak          | 0 <input type="radio"/> Tidak    1 <input type="radio"/> Ya | 1 <input type="radio"/> <1 kali    2 <input type="radio"/> 1 kali    3 <input type="radio"/> >1 kali |
| 2. | Batuk kering            | 0 <input type="radio"/> Tidak    1 <input type="radio"/> Ya | 1 <input type="radio"/> <1 kali    2 <input type="radio"/> 1 kali    3 <input type="radio"/> >1 kali |
| 3. | Demam                   | 0 <input type="radio"/> Tidak    1 <input type="radio"/> Ya | 1 <input type="radio"/> <1 kali    2 <input type="radio"/> 1 kali    3 <input type="radio"/> >1 kali |
| 4. | Sakit tenggorokan       | 0 <input type="radio"/> Tidak    1 <input type="radio"/> Ya | 1 <input type="radio"/> <1 kali    2 <input type="radio"/> 1 kali    3 <input type="radio"/> >1 kali |
| 5. | Pilek                   | 0 <input type="radio"/> Tidak    1 <input type="radio"/> Ya | 1 <input type="radio"/> <1 kali    2 <input type="radio"/> 1 kali    3 <input type="radio"/> >1 kali |
| 6. | Sakit telinga           | 0 <input type="radio"/> Tidak    1 <input type="radio"/> Ya | 1 <input type="radio"/> <1 kali    2 <input type="radio"/> 1 kali    3 <input type="radio"/> >1 kali |

Untuk setiap pertanyaan:  
 Beri tanda (✓) pada  yang sesuai; atau Isi dengan angka pada ; atau Tulis jawaban pada .....

**Case Report Form - "Epidemiologi Molekular *S. pneumoniae* pada Jemaah Haji Indonesia"**

Unit CEEBM RSCM-FKUI, Lembaga Biologi Molekular Eijkman, dan Pusat Kesehatan Haji Kementerian Kesehatan RI

Peneliti utama: Dr. dr. Kuntjoro Harimurti, SpPD-KGER, MSc

**C2.** Perawatan RS dalam 3 bulan terakhir:  Tidak (lanjutkan ke no C3)  Ya

**C2a.** Bila jawaban C2 (ya), lama masa rawat:     hari  Tidak diketahui

---

**C3.** Penggunaan antibiotika dalam 3 bulan sebelumnya:  Tidak  Ya  Tidak diketahui

---

**C4.** Riwayat penyakit komorbid:  Tidak ada (lanjutkan ke no C5)  Ada, Bila jawaban C4 (Ada), sebutkan:

**C4a.** PPOK  Tidak ada  Ada

**C4b.** Tuberkulosis paru  Tidak ada  Ada

**C4c.** Bronkiektasis  Tidak ada  Ada

**C4d.** Gagal jantung  Tidak ada  Ada

**C4e.** Penyakit hati kronik/sirosis hati  Tidak ada  Ada

**C4f.** Stroke  Tidak ada  Ada

**C4i.** Kencing Manis (Diabetes melitus)  Tidak ada  Ada

**C4k.** Lain-lain, sebutkan: .....  Tidak ada  Ada

---

**C5.** Dalam 5 tahun terakhir, Subjek pernah menerima Vaksin pneumococcus sebelumnya:  Tidak (lanjutkan ke no C6)  Ya

Bila jawaban C5 (ya):

**C5a.** Vaksinasi terakhir kali pada tahun:      Tidak diketahui

**C5b.** Jenis vaksin:  PCV 13  PPV23  PCV 7  PCV10  Tidak diketahui

---

**C6.** Subjek merupakan perokok:  Tidak (lanjutkan ke no C7)  Ya  Dulu YA, sudah berhenti

**C6a.** Bila jawaban C6 (ya), jumlah batang per-hari:     batang

Bila jawaban C6 (Dulu YA dan sudah berhenti):

**C6b.** Berhenti pada tahun:    ; **C6c.** Pada saat masih merokok, jumlah batang per-hari:     batang

---

**C7.** Keluarga yang tinggal dalam satu rumah merokok:  Tidak  Ya, Bila jawaban C7 (ya)

| <b>C7a.</b><br>Hubungan keluarga dengan subjek                                                                                                                                        | <b>C7b.</b><br>Jumlah batang perhari?                                                                                                      |
|---------------------------------------------------------------------------------------------------------------------------------------------------------------------------------------|--------------------------------------------------------------------------------------------------------------------------------------------|
| 1. <input type="radio"/> Orang tua; <input type="radio"/> Suami/Istri; <input type="radio"/> Anak;<br><input type="radio"/> Saudara; <input type="radio"/> Lain-lain, sebutkan:.....; | <input type="text"/> <input type="text"/> <input type="text"/> <input type="text"/> batang per-hari; <input type="radio"/> Tidak diketahui |
| 2. <input type="radio"/> Orang tua; <input type="radio"/> Suami/Istri; <input type="radio"/> Anak;<br><input type="radio"/> Saudara; <input type="radio"/> Lain-lain, sebutkan:.....; | <input type="text"/> <input type="text"/> <input type="text"/> <input type="text"/> batang per-hari; <input type="radio"/> Tidak diketahui |
| 3. <input type="radio"/> Orang tua; <input type="radio"/> Suami/Istri; <input type="radio"/> Anak;<br><input type="radio"/> Saudara; <input type="radio"/> Lain-lain, sebutkan:.....; | <input type="text"/> <input type="text"/> <input type="text"/> <input type="text"/> batang per-hari; <input type="radio"/> Tidak diketahui |
| 4. <input type="radio"/> Orang tua; <input type="radio"/> Suami/Istri; <input type="radio"/> Anak;<br><input type="radio"/> Saudara; <input type="radio"/> Lain-lain, sebutkan:.....; | <input type="text"/> <input type="text"/> <input type="text"/> <input type="text"/> batang per-hari; <input type="radio"/> Tidak diketahui |

**Diisi oleh**

Nama personel : .....

Tanda tangan:

Tanggal : dd   - September - 2015

Untuk setiap pertanyaan:

Beri tanda (✓) pada  yang sesuai; atau Isi dengan angka pada ; atau Tulis jawaban pada .....

**Case Report Form - "Epidemiologi Molekular *S. pneumoniae* pada Jemaah Haji Indonesia"**

Unit CEEBM RSCM-FKUI, Lembaga Biologi Molekular Eijkman, dan Pusat Kesehatan Haji Kementerian Kesehatan RI

Peneliti utama: Dr. dr. Kuntjoro Harimurti, SpPD-KGER, MSc

|                                   |                                                                                                                                |                                                                                                                                      |                                                                                                                  |
|-----------------------------------|--------------------------------------------------------------------------------------------------------------------------------|--------------------------------------------------------------------------------------------------------------------------------------|------------------------------------------------------------------------------------------------------------------|
| Stick the barcode inside this box | <b>E. Informasi Sumber Data</b>                                                                                                |                                                                                                                                      |                                                                                                                  |
|                                   | E1. Nama Personel:<br>.....                                                                                                    | E2. Tanggal pengambilan sampel: dd <input type="text"/> <input type="text"/> - Oct- 2015                                             |                                                                                                                  |
|                                   | E3. Embarkasi: 1 <input type="radio"/> Banda Aceh<br>2 <input type="radio"/> Medan;<br>3 <input type="radio"/> Jakarta/Bekasi; | 4 <input type="radio"/> Makassar/Gorontalo;<br>5 <input type="radio"/> Banjarmasin/Palangkaraya;<br>6 <input type="radio"/> Surabaya | E4. Nomor Kelompok terbang / Kloter : <input type="text"/> <input type="text"/> <input type="text"/> contoh: 023 |

**F. Paparan Saat Ibadah Haji**

F1. Perawatan RS selama di Arab Saudi:  Tidak (lanjutkan ke no F2)       Ya

F1a. Bila jawaban F1 (ya), lama masa rawat:    hari      99  Tidak diketahui

F1b. Bila jawaban F1 (ya), atas indikasi: .....      99  Tidak diketahui

F2. Sering mengalami gejala penyakit berikut selama berada di Arab Saudi:

|                                                                           |                                                                                            |
|---------------------------------------------------------------------------|--------------------------------------------------------------------------------------------|
| <b>F2a.</b><br>Gejala penyakit                                            | <b>F2b.</b><br>Jika jawaban F2a (ya), seberapa sering terjadi selama berada di Arab Saudi? |
| 1. Batuk berdahak <input type="radio"/> Tidak <input type="radio"/> Ya    | <input type="radio"/> <1 kali <input type="radio"/> 1 kali <input type="radio"/> >1 kali   |
| 2. Batuk kering <input type="radio"/> Tidak <input type="radio"/> Ya      | <input type="radio"/> <1 kali <input type="radio"/> 1 kali <input type="radio"/> >1 kali   |
| 3. Demam <input type="radio"/> Tidak <input type="radio"/> Ya             | <input type="radio"/> <1 kali <input type="radio"/> 1 kali <input type="radio"/> >1 kali   |
| 4. Sakit tenggorokan <input type="radio"/> Tidak <input type="radio"/> Ya | <input type="radio"/> <1 kali <input type="radio"/> 1 kali <input type="radio"/> >1 kali   |
| 5. Pilek <input type="radio"/> Tidak <input type="radio"/> Ya             | <input type="radio"/> <1 kali <input type="radio"/> 1 kali <input type="radio"/> >1 kali   |
| 6. Sakit telinga <input type="radio"/> Tidak <input type="radio"/> Ya     | <input type="radio"/> <1 kali <input type="radio"/> 1 kali <input type="radio"/> >1 kali   |

F3. Apakah selama di Arab Saudi, Anda pernah tinggal bersama dengan minimal 1 orang yang menderita infeksi saluran napas/paru?     Tidak (lanjutkan ke no F4)     Ya

*Dikatakan mengalami infeksi saluran napas bila terdapat gejala-gejala batuk, pilek, sakit tenggorok/nyeri menelan, dengan atau tanpa demam*  
*Dikatakan mengalami infeksi paru bila terdapat gejala batuk produktif (berdahak), sesak napas, nyeri dada pleuritik, dengan atau tanpa demam.*

F4. Penggunaan antibiotika selama berada di Arab Saudi:     Tidak       Ya      99  Tidak diketahui

**Diisi oleh**

Nama personel : .....      Tanda tangan:

Tanggal : dd   -October -2015
